# Supplementary material for: An Explainable Machine-Learning Model for Compensatory Reserve Measurement: Methods for Feature Selection and the Effects of Subject Variability
Source: MDPI journal article supplement (doi:10.3390/bioengineering10050612), 2023-05-19
Supplement: s1 [file s1]

## Supplementary Information

**Supplementary Table S1.** Summary of all 54 extracted features with their abbreviated name and description of their calculation. Features calculations were based on [18] and [21].

| Abbreviation       | Description                                                                                                  |
|--------------------|--------------------------------------------------------------------------------------------------------------|
| PPI                | Peak to peak interval                                                                                        |
| HRIP               | Half-rise to inflection point                                                                                |
| SBP                | Systolic blood pressure                                                                                      |
| DBP                | Diastolic blood pressure                                                                                     |
| PP                 | Pulse pressure                                                                                               |
| PA                 | Pulse Area                                                                                                   |
| SI                 | Shock Index                                                                                                  |
| t_sys_rise         | Duration of the systolic rise                                                                                |
| t_sys_dec          | Duration of the systolic decay                                                                               |
| t_dec              | Duration of the total decay                                                                                  |
| t_sys              | Duration of the systolic rise and systolic decay                                                             |
| t_dia              | Duration of the diastolic rise and decay.                                                                    |
| dn_sys             | Difference between the pressure at the systolic peak and the first inflection point.                         |
| avg_sys            | Average pressure of the systolic phase                                                                       |
| avg_dia            | Average pressure of the diastolic phase.                                                                     |
| avg_sys_rise       | Average pressure of the systolic rise                                                                        |
| avg_sys_dec        | Average pressure of the systolic decay                                                                       |
| avg_dec            | Average pressure of the overall decay of the waveform. From Point C to next Point A.                         |
| avg_sys_nodia      | Average pressure of the systolic phase with the pressure of the diastolic pressure subtracted                |
| avg_dia_nodia      | Average pressure of the diastolic phase with the pressure of the diastolic pressure subtracted               |
| avg_sys_rise_nodia | Average pressure of the systolic rise with the pressure of the diastolic pressure subtracted                 |
| avg_sys_dec_nodia  | Average pressure of the systolic decay with the pressure of the diastolic pressure subtracted                |
| avg_dec_nodia      | Average pressure of the overall decay of the waveform with the pressure of the diastolic pressure subtracted |
| sys_area           | Area under the curve of the systolic phase.                                                                  |
| pp_area_nor        | Area under the curve normalized by the number of samples in the waveform.                                    |

|                         |                                                                                                                                                                                   |
|-------------------------|-----------------------------------------------------------------------------------------------------------------------------------------------------------------------------------|
| sys_area_norm           | Area under the curve of the systolic phase normalized by the number of samples in the entire waveform                                                                             |
| sys_rise_area           | Area under the curve of the systolic rise.                                                                                                                                        |
| sys_rise_area_nor       | Area from the start of the beat to the systolic maximum normalized by the number of samples in the systolic rise                                                                  |
| sys_rise_area_norm      | Area from the start of the beat to the systolic maximum normalized by the number of samples of the entire waveform                                                                |
| sys_dec_area            | Area under the curve of the systolic decay. From the systolic peak to first inflection point.                                                                                     |
| sys_dec_area_nor        | Area under the curve of the systolic decay normalized by the samples in the systolic decay.                                                                                       |
| sys_dec_area_norm       | Area under the curve of the systolic decay normalized by the samples in the entire waveform.                                                                                      |
| dec_area                | Area under the curve of the entire waveform decay. From the systolic maximum to the start of the next beat.                                                                       |
| dec_area_nor            | Area under the curve of the entire waveform decay normalized by the number of samples in the waveform decay                                                                       |
| dec_area_norm           | Area under the curve of the entire waveform decay normalized by the number of samples in entire waveform.                                                                         |
| dia_area                | Area under the curve of the diastolic portion of the waveform                                                                                                                     |
| dia_area_nor            | Area under the curve of the diastolic phase of the waveform normalized by the number of samples in the diastolic phase.                                                           |
| dia_area_norm           | Area under the curve of the diastolic phase of the waveform normalized by the number of samples in the entire waveform                                                            |
| pp_area_nodia           | Area under the beat subtracted with the pressure at the first inflection point normalized by the number of samples.                                                               |
| sys_area_nodia          | Area under the curve of the systolic portion of the waveform subtracted by the pressure of the first inflection point.                                                            |
| sys_area_nor_nodia      | Area under the curve of the systolic portion of the waveform subtracted by the pressure of the first inflection point normalized by the number of samples in the systolic phase   |
| sys_area_norm_nodia     | Area under the curve of the systolic portion of the waveform subtracted by the pressure of the first inflection point normalized by the number of samples in the entire waveform. |
| sys_rise_area_nodia     | Area under the curve of the systolic rise subtracted by the pressure of the first inflection point                                                                                |
| sys_rise_area_nor_nodia | Area under the curve of the systolic rise subtracted by the pressure of the first inflection point normalized by the number of samples in the systolic rise phase.                |

|                          |                                                                                                                                                                                      |
|--------------------------|--------------------------------------------------------------------------------------------------------------------------------------------------------------------------------------|
| sys_rise_area_norm_nodia | Area under the curve of the systolic rise subtracted by the pressure of the first inflection point normalized by the number of samples in the systolic rise phase.                   |
| dec_area_nodia           | Area from the systolic maximum to the start of the next beat with subtracted diastolic pressure                                                                                      |
| dec_area_nor_nodia       | Area from the systolic maximum to the start of the next beat subtracted by the pressure at the first inflection point and normalized by the number of samples in the systolic decay. |
| dec_area_norm_nodia      | Area from the systolic maximum to the start of the next beat subtracted by the pressure at the first inflection point and normalized by the number of samples in the entire waveform |
| dia_area_nodia           | Area under the diastolic portion of the waveform with subtracted by the inflection point pressure                                                                                    |
| dia_area_nor_nodia       | Area under the diastolic portion of the waveform with subtracted by the inflection point pressure normalized by the number of samples in the diastolic phase                         |
| dia_area_norm_nodia      | Area under the diastolic portion of the waveform with subtracted by the inflection point pressure normalized by the number of samples in the entire waveform                         |
| slope_dia                | Average slope of the diastolic phase                                                                                                                                                 |
| slope_sys                | Average slope of the systolic phase                                                                                                                                                  |
| slope_desc_sys           | Average slope of the systolic decay                                                                                                                                                  |
